# Supplementary material for: Local forcing mechanisms challenge parameterizations of ocean thermal forcing for Greenland tidewater glaciers
Source: Copernicus journal article supplement (doi:10.5194/egusphere-2023-746), 2023-05-17
Supplement: Supplementary file [file egusphere-2023-746-AC2-supplement.pdf]

## Review of “Local forcing mechanisms challenge parameterization of ocean thermal forcing for Greenland tidewater glaciers” by Hager et al.

Hager et al. present ocean model simulations with MITgcm for an idealized domain and use those to test the accuracy of melt parameterisations for Greenland fjords as they are used in large-scale projections. This is a relevant work as ocean-driven retreat of glaciers is one of the important processes driving Greenland mass loss and of interest for publication in TC. I suggest some modifications to the analysis and presentation as detailed below to improve the accuracy and understanding of the work.

We thank the reviewer for their reading of the manuscript and providing suggestions that will improve its quality. We have incorporated as many suggestions as possible into the new version of the manuscript. However, the authors respectfully disagree with some of the reviewer’s comments; namely, there seems to be confusion on the difference between submarine melt parameterizations and thermal forcing parameterizations, as well as our statistical approach for comparing thermal forcing parameterizations. In cases of disagreement, the authors do their best to find a compromising solution when possible, or provide reasoning for the maintenance of the original text.

### General comments:

- **Structure:** the structure of the manuscript could be improved as at the moment it is not clearly going towards one aim, which makes it hard to read. Information is spread into several places, e.g., the ISMIP melt parameterisations are introduced in the introduction, the new ones in parts in the Methods 2.2, in the discussion in Section 4.2. You could make the thermal forcing parameterizations your central point and move it earlier. In addition, you should introduce all thermal forcing parameterizations explicitly, i.e., giving their equations, in the methods in Section 2.2. Then you can validate them against the model simulations in the results and discuss their caveats and benefits in the Discussion. Ideally, you can end with a recommendation.

The central point of this manuscript is the testing of ISMIP6 thermal forcing parameterizations. This is explicitly stated in Lines 8-9, 69-71, 451-454 and implicitly throughout. The purpose of the ISMIP6 melt/retreat parameterizations provided in the Introduction (Eqs. 1 and 2) are to provide context for both ISMIP6 thermal forcing parameterizations and to set the stage for the rest of the paper. The thermal forcing parameterizations introduced in Methods 2.2 do not originate from this study, but are two separate methods previously used by ISMIP6 to calculate the thermal forcing terms in Eqs. 1 and 2. We include the ISMIP6 thermal forcing parameterizations in the Methods because we directly use them in our study, whereas the ISMIP6 submarine melt/retreat parameterizations are only used for context. After extensive testing of the ISMIP6 thermal forcing parameterizations in the Methods and Results sections, we found they were inadequate to accurately extrapolate far-field ocean thermal forcing to the near-glacier region, so we thus introduce possible alternatives in the Discussion section. This step can only be accomplished following the results from the ISMIP6 thermal forcing parameterizations, as alternatives would not be needed if ISMIP6 parameterizations had performed well. Based on our additional testing, we encourage the use of AMfit in lines 471-474, as it is the most accurate thermal forcing parameterization tested; however, ice sheet models do not yet have the capability to predict iceberg prevalence, so we refrain from making a hard recommendation of this method until other capabilities of ice sheet models improve. Additionally, in lines 476-482 we recommend possible avenues for the development of a fjord-scale box model that could further improve coupling between global climate and ice sheet models.

Equations for the ISMIP6 thermal forcing parameterizations are provided in Lines 139 and 151. However, most of the differences between parameterizations are accomplished through step-by-step data manipulation, and do not cleanly lend themselves to written equations. We therefore find the combination of equations and written descriptions of our parameterizations, as done in Sections 2.2, 4.2, and Figure C1, to be the most effective way to communicate this information. This is the same strategy as done in other papers that use thermal forcing parameterizations (e.g., Slater et al., 2019; Slater et al., 2020; Morlighem et al., 2019; and Cowton et al. 2018). We acknowledge that the Gade Slope (Line 381) is not well defined in our manuscript, and will include this equation in the next version of the manuscript.

**Experimental design / results:** At the moment you are comparing apples and oranges for the different parameterizations: the AMmelt/ISMIP6melt and AMretreat/ISMIP6retreat parameterizations are evaluated by comparing  $\theta_{gl}$ , while the AMberg, AMconst and AMfit parameterization are evaluated with the profile. This makes it hard to actually see how much AMberg improves over AMmelt (there is a lot about the importance of the iceberg melt in the document, but the actual effect on melt rates remains unclear, as it influences mainly the upper layers). I suggest that you compare all parameterizations with respect to all three quantities  $\theta_{gl}$ ,  $\theta_z$ ,  $\theta_A$  as well as the corresponding melt rates through equation (2), and also compare all to the measurements (Fig 5). Best would be to summarize results for all parameterizations in one table / figure. Otherwise, it is not clear how you rank the importance of processes (section 4.1).

The use of different thermal forcing metrics comes from ISMIP6 experiments, because each ISMIP6 thermal forcing parameterization is designed to predict either  $\theta_z$  (as is the case ISMIP6retreat) or  $\theta_{gl}$  (as is the case for ISMIP6melt). By comparing the parameterizations only to their intended metric, we believe we are in fact avoiding an apples to oranges comparison. For example, drawing a comparison between  $\theta_z$  and ISMIP6melt would be asking the parameterisation to do something it was never intended to do.

The two separate methods used in ISMIP6 experiments to parameterize submarine melting (Eqs. 1 and 2) rely on two different definitions of near-glacier thermal forcing. Equation 1 relies on ISMIP6retreat, which was originally developed by Slater et al. (2019) to parameterize  $\theta_z$  (a depth average thermal forcing between 200-500m depth). Conversely, Equation 2 relies on ISMIP6melt, which was originally developed by Morlighem et al. (2019) to parameterize  $\theta_{gl}$  (grounding line thermal forcing). When testing the accuracy of these thermal forcing parameterizations, we compare each only to its intended thermal forcing metric. In this way, we ensure that we are testing its accuracy in a manner consistent with the original intent of the parameterization.

As discussed in Lines 350-375, using a depth-dependent scalar to define near-glacier thermal forcing creates uncertainty in thermal forcing parameterizations. We therefore developed new area-mean parameterizations in Section 4.3, which are an attempt to minimize this uncertainty. The root mean square error of each of these new parameterizations (AMberg, AMmelt, AMconst, AMretreat, AMfit) is a comparison to the area-mean near-glacier thermal forcing ( $\theta_{\bar{A}}$ ) in our simulations, as that is the metric these parameterizations were intended to represent. AMretreat, AMmelt, and ISMIP6retreat are never compared to  $\theta_{gl}$ , as this would be inconsistent with their intended purpose.

All profiles used to create each parameterization were assessed by their ability to parameterize a full near-glacier thermal forcing profile. As discussed in Lines 276-280, this is done because there is still an ongoing glaciological debate over which thermal forcing definition is most influential on ice dynamics. As discussed by the reviewer, the results from all parameterizations are already summarized in Table 3. The metric that each parameterization is compared to when calculating the root mean square error ( $\theta_{gl}$ ,  $\theta_{\bar{z}}$ , or  $\theta_{\bar{A}}$ ) is detailed in Table 3 and the Table 3 caption. The authors appreciate the reviewer's suggestion to compare all parameterizations to the observations of Ilulissat Icefjord, and will include this information in Table 3.

The submarine melt parameterizations used in ISMIP6 and within the MITgcm are known to be inaccurate (e.g., Jackson et al., 2020), and we therefore avoid reporting absolute melt rates from Eq. 2 or the MITgcm. As the purpose of this paper is just to test the accuracy of the thermal forcing parameterizations, we limit this discussion to the range of melt rates provided by Eq. 2 when using the various thermal forcing parameterizations (Section 4.3). The authors will add a sentence clarifying this point in Section 4.3.

- **Generalization of results:** in your ocean model runs you use one background forcing and one idealized geometry – how much do your results depend on this? You should at least discuss this caveat.

We agree that this is an important point – thank you for bringing it up. We designed our experiments with one constant background forcing to be compatible with the methodology of ISMIP6 experiments. In ISMIP6, the Greenland coast is divided into seven regions in which temperatures and salinities are annually averaged, so that all modeled glaciers within a given region experience the same offshore ocean conditions. Our experiments thus emulate this approach by imposing the same “regional” background forcing in all of our simulations. In effect, we created an arbitrary ISMIP6 “region”, then tested how much fjord conditions may vary within that region based on local forcing mechanisms (Lines 73-35).

Previous studies point to sill-driving mixing (and thus sill depth) as a primary mechanism for local water transformation and control on fjord water properties (e.g., Ebbesmeyer and Barnes, 1980; Cokelet and Stewart, 1985; Hager et al., 2022, Bao and Moffat, 2023), while fjord width, length, and depth are not expected to greatly influence water properties, just circulation (e.g., Carroll et al., 2018). Thus, we chose to focus on sill depth as the primary geometric constraint by using three different idealized geometries: S100, S250, and S400. These geometries were chosen to span the depth range of the Atlantic-Polar Water thermocline, which is a ubiquitous feature around Greenland. As we draw our conclusions from the relative depths of the sill and thermocline (not absolute depths), we do not anticipate this choice will impact our results. We acknowledge this wasn't fully clear in the manuscript, so we will add a sentence to Section 2.1 explaining our choice to focus on sill-driven mixing, instead of other geometric constraints.

We will also add a sentence at Line 461 akin to: “While we have made attempts to compare our idealized results against observations of multiple Greenland fjords, we anticipate some variability when applied to realistic fjord geometries and forcing” to highlight the comparison of our results to observations in multiple locations in Greenland (Lines 340-349, lines 396-407, and Figure 5), but acknowledge some uncertainty exists when applying these parameterizations to realistic fjords.

## Specific comments:

### Abstract:

- Line 13: What the 2.9°C refer to is unclear, maybe rather give the maximum modification that the TD experiences.

We believe it is already clear what the 2.9C refers to, so would like to leave this sentence as is, but perhaps the reviewer could expand on what is unclear?

- Line 15-17: It's unclear if your parameterisation includes bathymetry?

Thank you making this point – we will add the word “additionally” to this sentence to make clear that the iceberg parameterization also includes the adjustment for bathymetry discussed in the previous sentence.

### Introduction:

- line 31: Morlighem et al., 2019 is no projection, Jourdain et al., 2020, introduces parameterisations for Antarctica, so neither citation really fits to your sentence

Both citations here are in reference to “simplifying parameterizations of oceanic boundary conditions” and not “sea level rise projections.” To the authors’ knowledge, Morlighem et al. (2019) is the original study that uses a thermal forcing parameterization that has a bathymetric adjustment, similar to ISMIP6melt. Jourdain et al. (2020) introduces ocean thermal forcing parameterizations used in the Antarctic ISMIP6 experiments. As this sentence is a general statement about parameterizations used in sea level rise projections, and is not specific to Greenland, we feel this citation is justified here.

We acknowledge the original reading of this sentence was confusing in regards to the citations, so we will change the sentence to read:

“... and instead, sea level rise projections have relied on poorly-validated simplifying parameterizations of ocean boundary conditions in ice sheet models, such as those developed in Morlighem et al. (2019), Jourdain et al. (2020), and Slater et al. (2019). These parameterizations create large sources of uncertainty when predicting future mean sea levels ...”

- line 31: Seroussi et al. is for Antarctica, the citation does not fit here.  
This sentence is a general statement about the impact of thermal forcing parameterizations on the uncertainty of sea level rise projections and is not specific to Greenland. We therefore feel this citation is justified here.
- line 40: Smith et al., 2020 presents satellite observations of thickness changes, it does not link them to the ocean forcing, the citation does not seem to fit here.

Smith et al. (2020) presents satellite observations of thickness changes, but importantly, also pins changes in ice thickness to specific atmospheric and/or ocean forcing. A primary result from this paper is that ocean warming is responsible for modern day ice loss from Antarctica, while

ice loss from Greenland is the combined result of heightened atmospheric and ocean forcing. Specifically, our purpose for citing this paper in Line 40 is to highlight their conclusion that: “...the combination of increased surface melt and warmer ocean temperatures has led to the enhanced submarine melting of submerged glacier termini and has allowed more rapid calving by reducing the presence of rigid mélange in the fjords, each of which have increased glacier velocities and ice discharge into the ocean.”

- Equation (1) here glacier front changes are directly linked to frontal melt changes, however, this misses out changes in ice dynamics: a glacier terminus could stay in the same position for higher melting when the ice discharge increases at the same time (at least for a while). This seems to be missing some physics?

Yes, this is a crude parameterization of ocean-driven glacier retreat and is undoubtedly missing important physics, as is acknowledged in the paper describing the parameterization – Slater et al. (2019). Nonetheless, this is one of the two parameterizations for Greenland frontal ablation used by ISMIP6 experiments, and we only include it here only to provide context for thermal forcing parameterization it uses. It is outside the scope of this paper to evaluate the legitimacy of this equation, as we are solely concerned with thermal forcing parameterizations.

- Explicitly state somewhere that you do not evaluate melt parameterizations, just the thermal forcing aspect. And state clearly, that the ISMIP parameterisations underlies a thermal forcing parameterisation, that the resulting melt is relevant, however, this is still open and here always done using the equation (2, except for the retreat parameterisation in ISMIP6).

The purpose of this paper – to test the accuracy of the thermal forcing parameterizations – is stated in Lines 69-71 and elaborated on in Lines 75–78. We include the ISMIP6 submarine melt parameterization here only for context and it is outside the scope of this paper to assess the validity of this equation. To avoid confusion, we will add a sentence at Line 778 stating: “This paper focuses solely on thermal forcing parameterizations and makes no attempt to test the validity of Eqs. 1 and 2, which are provided here only for context.”

- My understanding is that equation (2) is mainly used to put the importance of thermal driving differences in the context to melt rates and not suggested as a valid melt parameterisation? If this is correct, state it.

Please see response to above comment.

Methods:

- line 121: Where was the background velocity implemented?

This is a parameter within IcePlume and is needed to drive melt across the glacier face. We will restructure the wording of this sentence to make it more evident where this is implemented.

- What about sea ice in MITgcm?

Thank you for making this point, as this is one local forcing mechanism we ignore. To limit unconstrained parameters, we do not explicitly include sea ice in our experiments. However, the

influence of sea ice melt is likely captured to some degree by the parameterization of surface iceberg melting through the IceBerg Package. As iceberg depths are prescribed using an inverse power law size frequency distribution, a vast majority of icebergs are very shallow and could be thought of as representing sea ice interspersed among larger icebergs. One caveat to this reasoning is that IceBerg does not account for brine rejection caused from sea ice formation. While we do not expect this process influence near-glacier thermal forcing in deep fjords that flush frequently, it is possible sea ice could be an important factor in some shallow fjords. We will add a sentence to this effect at Line 133.

- line 155: do you want a new paragraph for the sentence “We compare..”

Thanks for the suggestion - we will make this sentence its own paragraph in the next version of the manuscript.

- line 157: Does “modeled area-mean” mean that it is averaged over the entire depth? And above, is the TD at the grounding line the one from the lowest cell?

Yes, the area-mean is an average across the entire area of the glacier face (both vertically and horizontally). The grounding line is located at the lowest cell of the glacier face. We can insert clarification to this sentence to make these definitions clearer.

- Table 1: Define better exactly how the thermal forcing is calculated (e.g., which grid cells are used, just the closest to the calving front or are they averaged? How is this handled with different resolutions?).

As with other “near-glacier” metrics, near-glacier thermal forcing is a 10-day average of the two rows of cells closest to the glacier face (as described in Lines 97-98). This is the same for both resolutions.

- in general, I miss more motivation for your methods, e.g., why do you want to quantify sill-driven mixing? Why do you use three thermal forcing metrics (and not just one)?

The focus on sill-driven mixing is motivated by previous studies (e.g., Ebbesmeyer and Barnes, 1980; Cokelet and Stewart, 1985; Hager et al., 2022; Bao and Moffat, 2023) that show fjord mixing is primarily restricted to sill regions. A clarifying sentence will be added to the beginning of Section 2.3.

The use of three thermal forcing metrics was done to be consistent with the original goals of ISMIP6retreat and ISMIP6melt. ISMIP6retreat was originally designed by Slater et al. (2020) to parameterize  $\theta_z$ , while ISMIP6melt was designed by Morlighem et al. (2019) to parameterize  $\theta_{gl}$ . We therefore test ISMIP6retreat and ISMIP6melt by comparing to  $\theta_z$  and  $\theta_{gl}$  in our model, respectively, to ensure we are comparing equivalent quantities. As described in Lines 358–375,  $\theta_A$  was then developed in this paper as an alternative to  $\theta_z$  and  $\theta_{gl}$  that is sensitive to other processes not captured by the original ISMIP6 parameterizations. The authors will reword Lines 155 – 157 in the original text to make this clearer.

- furthermore, I miss a motivation and explanation for the newly introduced melt parameterisations in the method.

The parameterizations introduced in the methods are the thermal forcing parameterizations used by Eqs. 1 and 2 to drive frontal ablation, and are not new melt parameterizations. We feel this is appropriately described in Lines 136 – 138, Line 153, and throughout Section 2.2, but are open to feedback on how to clarify this distinction.

#### Results:

- Line 210: Not sure where exactly you find the grounding line average salinity in the Figure? Is it simply the deepest value (at -800m)?

Grounding line water properties are taken from near-glacier cells at the base of the glacier, here at -800m. This clarification can be added to Line 98 in the original text.

- line 215: “..when iceberg keels extend... or subglacial discharge ... below sill depth” – from the figure 2, this seems to be true for sill depth of -250 and -100m. How can you draw the logical conclusion that this is linked to the keel depth and vertical extend of the plume from this figure?

In S400 runs, no icebergs extend below sill depth and water properties are entirely homogenous below sill depth. In S250 runs, only two runs have significant variability below sill depth; these are the two low resolution runs with iceberg keel depths extending to 400 m. Variability in these profiles only occurs in the upper 400 m and coincides with the input of iceberg melt water (and associated heat sinks) shown with  $Q_{\text{berg}}$  and  $H_{\text{berg}}$  in panels b and e. In all iceberg S100 runs, keels extend below sill depth and thus contribute to cooling of the entire water column (in combination with sill-driven reflux). Additional variability seems to coincide with the terminal plume depths shown in black and white triangles.

This sentence states that variability below sill depth only occurs when iceberg keels extend below sill depth or when subglacial plumes reach neutral buoyancy below sill depth. This holds true for all runs, and water below sill depth remains homogenous in all runs where this is not the case.

- line 219-221: this is hard to see from Figure 2. At least in panel (e) it looks like there might be blue triangles left and right of black triangles (and the lines intersect above of -200m).

Thanks for the suggestion - Figure 2 will be rearranged to make these symbols more visible. A reference to Table C1 will also be added, which also contains the same information.

- line 224: again, this refers to the middle and right columns, or how can this be seen more precisely in the figure?

Figure 2 will be rearranged so that each panel is enlarged and this pattern more visible.

- line 237: the third EOF “depicts temperature variability coincident with the terminal depth of subglacial plumes” – I am not sure this is very clear, e.g., the lower terminal plume depth

around -400 m does not coincide with a change in the temperature profile? Why does this EOF not represent the reflux?

The bottom cluster of terminal plume depths does coincide with a modulation in the shape of the third EOF mode, as do the approximate depths of the upper two clusters of terminal plume depths. In both this study and in Davison et al. 2022, reflux uniformly cools/warms the water column below sill depth (and should not alter water properties above sill depth), and thus we do not believe the third EOF mode could represent this process. While the authors acknowledge that the physical interpretation of EOFs modes can be ambiguous, we feel subglacial discharge is the most plausible explanation for third EOF mode. However, as we are least confident with this physical interpretation compared to the other EOF modes, we will add language at line 237 to reflect this uncertainty.

- line 243-247: where are the absolute numbers? Can you add a table containing them?

Freshwater fluxes for each run will be added to Figure C1 and moved into the main paper.

- line 248 – 250: this is simply because of the latent heat required to melt the icebergs, or?

Yes, as is explained in Lines 310 – 312. We feel this is better served as a discussion point, because it is an interpretation of the data.

- Figure 2: Are the profiles from the center of the calving front or are they averaged over the calving face? I would mention earlier on that the columns are for the different sill depth, e.g., add this as titles to the columns. The figure is quite dense, you could help the reader by indicating what features they should look at in the figure. E.g. for the sentence in lines 212-214 “However, water properties...” you could add in the end “.. for S100 runs (compare the blue and black triangles indicating the depth-averaged thermal driving in the ocean simulations across the three lower panels). Same for lines 216, explain how the reader can see that “iceberg keels extend beyond sill depth” and “subglacial plumes reach neutral buoyancy”. Same for the next sentence. It looks like some triangles are missing, e.g., there are no black triangles in panel (f)?

As described in Lines 92-32, all “near-glacier” output is an average of all cells within two rows of the glacier face. We can change the wording of this sentence to make this clearer. Sill depth column titles were intentionally left out because the figures are already dense and it was the intent that the horizontal dashed line depicting sill depth could make this distinction. We will move up the explanation of these lines and the difference between the columns higher up in the caption so this is immediately evident to the reader.

We will change “(Figure 2)” in Line 214 to “(black/blue triangles in Figure 2d-f)”.

All black triangles are accounted for, but some overlap others. As discussed above, we will rearrange and enlarge Figure 2 to make these more visible.

Lines 215-217 will be changed to “...with only minor variability occurring when iceberg keels extended below sill depth (see  $Q_{\text{berg}}$  and  $H_{\text{berg}}$  profiles in Figure 2) subglacial discharge plumes reached neutral buoyancy below sill depth (this most often occurs with line-plumes; see black/white triangles in Figure 2a-c).” Additionally, the last line of the caption will be changed to

“The vertical distribution of iceberg freshwater fluxes ( $Q_{\text{berg}}$ ) and heat fluxes ( $H_{\text{berg}}$ ) are provided in a-c and d-f, respectively, to depict the depth of iceberg melt relative to sill depth and profile variability.”

- Figure 4b: What does this mean that there is higher reflux with higher freshwater input at depth?

The greater the portion of freshwater input that enters the system below sill depth, the greater the portion of water that is refluxed at the entrance sill.

- equation 12: what is the motivation for this “skill score” definition, is this something commonly used?

This is a commonly used metric to compare modeled profiles of ocean/atmospheric properties to observations and was originally developed in Willmott (1982). We will include a citation to this paper in Line 280.

Discussion:

- I would move part of the discussion to the results, e.g., the definition of the new parameterisations for thermal driving, how this is translated into melt.

The main purpose of this paper is to evaluate the current ISMIP6 methods for parameterizing thermal forcing and identify the primary sources of error. The additional parameterizations introduced in Section 4.2 and the discussion on melt rate uncertainty (Section 4.3) should therefore be treated as an exploration of possible improvements to the current ISMIP6 methods and what impact this could have on ISMIP6 melt rates. Thus, we feel these sections are better suited as discussion points.

- Section 4.1: you are comparing unlike things here as you are using for 1. the average thermal driving as the relevant quantity, while in 2.-4. your relevant quantity is the variability in the thermal driving profile. If you want to list the processes “in order of importance”, I suggest that you think about what defines their importance (relevant quantity is resulting basal melt rate, temperature profile or the average temperature) and then compare them with respect to this quantity.

This is a good point and alludes to one of the main difficulties in establishing a thermal forcing parameterization that is useful for ice sheet models. As discussed in Lines 358-375, the best method for defining an ocean thermal forcing metric that is relevant to glacier frontal ablation processes is still a topic of ongoing debate. It is unclear if frontal ablation can be accurately determined solely from grounding line thermal forcing, mean thermal forcing, or an entire profile. At the same time, current submarine melt parameterizations cannot be corroborated by direct observations of melt at glacier termini. Therefore, there is no straightforward relevant quantity of interest for thermal forcing parameterizations. Instead, Section 4.1 determines the level of importance of each mechanism primarily based on its influence on full profile variability (including the translation of profiles that occurs between sill depth groups, which is equivalent to  $\Theta_A$ ), thus capturing any potentially relevant quantity of interest. When possible, we

then use additional lines of evidence, such as heat fluxes, to further corroborate our ranking of important processes.

Accordingly, the authors will make the following changes to the manuscript:

1. Add a sentence at the beginning of Section 4.1 explaining why direct comparison is challenging and explaining our reasoning for comparison metrics
  2. As discussed previously, we will reword Lines 155-157 to explain why multiple thermal forcing metrics exist and the difficulty of establishing a relevant quantity of interest
  3. Add a sentence to the beginning of Section 4.3 explaining why we don't compare our results to absolute submarine melt rates.
- lines 350 and following: is this caveat ("the dependence on specific depth when calculating thermal forcing") not the same caveat as discussed in the paragraph above, i.e., that sills are highly relevant for thermal forcing in the fjords?

This sentence is referring to the ISMIP6 practice of defining  $\Theta_z$  and  $\Theta_{gl}$  at specific depths ( $\Theta_z$  is only defined between 200-500 m and  $\Theta_{gl}$  is only defined at the grounding line). We can reword this sentence to clarify this point.

- give the equations for the parameterisations, e.g., how exactly follows the AMberg the Gade line (what ambient water masses do you assume to mix with, how much mixing occurs, see line 380)?

An equation for the Gade slope will be added to Line 380.

- line 386: "iceberg melting" instead of "submarine melting"?

This will be changed to "iceberg melting"

- Figure 5: ISMIP6retreat label should be AMretreat, or (this is also mixed up in the text)? Please add the other thermal driving parameterisations as well, i.e., AMmelt, AMconst as well as dots for the ISMIP6 ones. How well do they perform?

This should be ISMIP6retreat, although the profiles used for ISMIP6retreat and AMretreat are the same. Other parameterizations can be added to this plot.

- line 405: ISMIP6melt is not on the figure 5, AMretreat shows higher temperatures. The difference could also stem from other reasons than "temporally varying conditions", i.e., horizontal variability in the sill and ice conditions...

ISMIP6melt will be added to the figure. All observed profiles (gray) have warmer temperatures below sill depth than are predicted by the profile for AMberg (blue).

We see no evidence of meaningful horizontal temperature gradients between the sill-driven mixing zone and glacier face in our modeling, regardless of iceberg distribution, subglacial discharge, etc. Observations of glacial fjords generally support this claim (e.g., Straneo et al.,

2012; Mortensen et al., 2014, Moffat et al., 2018, Gladish et al., 2015). Therefore, the most likely explanation is that the warm water observed at depth is a remnant of warmer water that had previously entered the fjord earlier in the summer. We will add a sentence in Section 3.1 describing the lack of strong horizontal gradients in our simulations, and will refer to that sentence in Line 405 when providing our interpretation.

- Figure 6: Difference between each theta and what? The far-field theta/boundary conditions? How are sub-shelf melt rates calculated with (2) when using a thermal driving profile? Non-iceberg runs are black? I think also the green markers show the thermal forcing parameterisations differences in thermal driving relative to the boundary conditions / ISMIP6retreat case? Don't you model melt rates with MITgcm and IcePlume, why don't you compare to those as well?

Figure 6 depicts the difference between the various thermal forcing definitions (Theta\_z, Theta\_A, and Theta\_gl) within each of our simulations, as is also described in Lines 415-418. The word "difference" in the caption may thus be better described as a "range", and we will change the wording accordingly.

Thermal forcing parameterizations were computed as described in the text and the resultant value is used as Theta in Eq. 2. The scalar values provided by each parameterization, not the profiles used to calculate the scalars, are used in Eq. 2.

Non-iceberg runs are dark gray. The gray box in the legend was intended to be the same shade of gray as the markers, but there was a bug in the code. This will be fixed.

The green markers depict the range of all seven thermal parameterizations explored in the paper, grouped by sill depth and subglacial discharge. Again, we will change the word "difference" to "range" to make this more evident.

As discussed previously, we avoid comparing our results to absolute submarine melt rates, because melt parameterizations are not yet reliable. We will include this point in Section 4.3.

- line 417: how much is the 200m/yr in relative terms (i.e., how large are the melt rates overall)?

This is a difficult comparison to make, as direct observations of tidewater glacier submarine melt rates do not exist in Greenland to our knowledge, and model submarine melt parameterizations are known to be inaccurate. Nonetheless, an uncertainty of 200 m/yr stemming just from ocean thermal forcing parameterizations (in addition to the added uncertainty within the formulation of the melt parameterization) is likely to be significant for some glaciers, particularly when coupled to other feedback mechanisms (e.g., calving processes, etc.).

- line 420: within a given run, theta\_z, theta\_A and theta\_gl calculated by the forcing parameterisations differed...(or how did you estimate the difference)?

This sentence refers to the seven thermal forcing parameterizations explored in this paper and referred to in the previous sentence (ISMIP6melt, ISMIP6retreat, AMberg, etc.), and not theta\_z,

theta\_A, or theta\_gl, which are metrics calculated from the model to test the parameterizations. The difference is the range of thermal forcing values given by the parameterizations.

- line 434: Could it be that the reflux is hard to get from the EOF because it is linked to the bathymetry and you removed that in your EOF analysis?

That is likely the case here, as was discussed in Lines 238-241.

- line 484: “reduces error in *thermal driving profiles* compared to ismip6 estimates”..

Thank you for this suggestion – Line 448 will be changed to “Although the updated parameterizations present in this paper greatly reduce thermal forcing error compared to ...”

- line 461: add “in shallow silled fjords in our idealised simulations”.

Thank you for this suggestion. This sentence will be changed to “... however, without accounting for bathymetry, parameterizations overpredict thermal forcing by at least 2°C in our idealized shallow-silled simulations.”

- Add that it remains an open question which theta to use, or how to translate the profile into melt rates.

This is done in detail in Lines 358-375 and touched on again in Lines 472-474. A new sentence will be added at Line 475 to emphasize this as an importance direction of future research.

- I miss a discussion of the next steps (develop and evaluate melt parameterizations) and caveats (idealized model domain, only one background forcing, comparing to one fjord,...).

Multiple next steps are discussed in the conclusion. These include (1) development of an iceberg prevalence prediction method so that AMfit can be used accurately (Lines 474 – 475), and (2) the development of a box-model parameterization that includes reflux (Lines 476 – 480). As noted above, we will also add a sentence highlighting the importance of determining which thermal forcing metric to use in melt parameterizations. The development and evaluation of melt/retreat parameterizations is a related but separate area of research.

Lines 340-349, lines 396-407, and Figure 5 are aimed at broadening the results of our idealized simulations to observations of multiple Greenland fjords. Nonetheless, we will add a sentence akin to “While we have made attempts to compare our idealized results against observations of multiple Greenland fjords, we anticipate some variability when applied to realistic fjord geometries and forcing” at Line 461.

The choice to use one background temperature/salinity forcing was made to be consistent with the design of ISMIP6 experiments, and temperature/salinity profiles at the open boundaries were chosen to represent conditions surrounding Greenland. The feature of importance in boundary condition is the depth of the Atlantic-Polar water thermocline in relation to the sill depth. While the depth of this thermocline may change throughout Greenland, we base our findings only on its depth relative to sill depth, and thus, we do not anticipate this choice impacting our results.

## Appendix:

- State what the abbreviation TEF stands for.

Please see Line 160 for a definition of TEF.

- line 489: what do you mean with volume conservation? In general, mass, energy and momentum are conserved, but volume might change with density (temperature, salinity, pressure) changes. Please explain.

The TEF framework is based on the assumption that the mass and volume entering the mixing zone must equal the mass and volume exiting the mixing zone.

- Equation A4: How do these follow from “mass and volume conservation”? Is it rather that you assume salinity on the glacier side is lower because of mixing with melt water?

Yes, TEF is specifically designed for estuaries where there is a freshwater source at the head of the estuary. Therefore, the freshest layer must be the outward flowing (upper) layer on the glacierward side of the mixing zone, and the densest layer must be the inward flowing (lower) layer on the ocean side of the mixing zone. Then due to mixing across the sill, the remaining layers must have a density somewhere between these two. This is described in detail within the sources cited in this section.

- Figure C1: This is the algorithm for AMfit, right? The definition of effective depth could be repeated here, or you could point to the relevant location in the methods.

This is the step-by-step process for computing AMberg and AMmelt, which when implemented in iceberg and non-iceberg laden fjords, respectively, make AMfit. We can point to Section 2.2 where effective depth is defined.

- Table C1: Please add  $\theta_{gl}$  and  $\theta_z$  here as well.

Thanks for the suggestion -  $\theta_{gl}$  and  $\theta_z$  will be added to the table
